# Supplementary material for: CaV1.3-selective L-type calcium channel antagonists as potential new therapeutics for Parkinson's disease
Source: Springer Nature journal article supplement (doi:10.1038/ncomms2149), 2012-10-23
Supplement: 41467_2012_BFncomms2149_MOESM15_ESM.mol [file 41467_2012_BFncomms2149_MOESM15_ESM.mol]

  ChemDraw10081205352D

 23 25  0  0  0  0  0  0  0  0999 V2000
   -2.5623   -0.2062    0.0000 C   0  0  0  0  0  0  0  0  0  0  0  0
   -1.8478    0.2062    0.0000 N   0  0  0  0  0  0  0  0  0  0  0  0
   -1.1333   -0.2062    0.0000 C   0  0  0  0  0  0  0  0  0  0  0  0
   -0.4189    0.2062    0.0000 N   0  0  0  0  0  0  0  0  0  0  0  0
    0.2956   -0.2062    0.0000 C   0  0  0  0  0  0  0  0  0  0  0  0
   -1.1333   -1.0313    0.0000 O   0  0  0  0  0  0  0  0  0  0  0  0
    1.0101    0.2062    0.0000 C   0  0  0  0  0  0  0  0  0  0  0  0
    1.7246   -0.2062    0.0000 C   0  0  0  0  0  0  0  0  0  0  0  0
    2.4390    0.2062    0.0000 C   0  0  0  0  0  0  0  0  0  0  0  0
   -1.8478    1.0313    0.0000 C   0  0  0  0  0  0  0  0  0  0  0  0
   -0.4189    1.0313    0.0000 C   0  0  0  0  0  0  0  0  0  0  0  0
   -1.1333    1.4438    0.0000 C   0  0  0  0  0  0  0  0  0  0  0  0
   -2.5623    1.4438    0.0000 O   0  0  0  0  0  0  0  0  0  0  0  0
    0.2956    1.4438    0.0000 O   0  0  0  0  0  0  0  0  0  0  0  0
    1.7246   -1.0313    0.0000 C   0  0  0  0  0  0  0  0  0  0  0  0
    2.4390   -1.4438    0.0000 C   0  0  0  0  0  0  0  0  0  0  0  0
    3.1535   -1.0313    0.0000 C   0  0  0  0  0  0  0  0  0  0  0  0
    3.1535   -0.2062    0.0000 C   0  0  0  0  0  0  0  0  0  0  0  0
    3.8680    0.2062    0.0000 Cl  0  0  0  0  0  0  0  0  0  0  0  0
   -3.3159    0.1293    0.0000 C   0  0  0  0  0  0  0  0  0  0  0  0
   -3.8680   -0.4838    0.0000 C   0  0  0  0  0  0  0  0  0  0  0  0
   -3.4555   -1.1983    0.0000 C   0  0  0  0  0  0  0  0  0  0  0  0
   -2.6485   -1.0267    0.0000 C   0  0  0  0  0  0  0  0  0  0  0  0
  1  2  1  0      
  2  3  1  0      
  3  4  1  0      
  4  5  1  0      
  3  6  2  0      
  5  7  1  0      
  7  8  1  0      
  8  9  2  0      
  2 10  1  0      
  4 11  1  0      
 10 12  1  0      
 12 11  1  0      
 10 13  2  0      
 11 14  2  0      
  8 15  1  0      
 15 16  2  0      
 16 17  1  0      
 17 18  2  0      
 18  9  1  0      
 18 19  1  0      
  1 20  1  0      
 20 21  1  0      
 21 22  1  0      
 22 23  1  0      
 23  1  1  0      
M  END
